# Supplementary material
Source: HighWire-hosted journal article supplement (https://srh.bmj.com/highwire/filestream/141406/field_highwire_adjunct_files/0/bmjsrh-2020-200954supp001_data_supplement.pdf)
Supplement: bmjsrh-2020-200954supp001_data_supplement.pdf [file bmjsrh-2020-200954supp001_data_supplement.pdf]

## SUPPLEMENTARY MATERIAL

## Supplementary Data Table

| Note: the remaining response categories (e.g. "No", "Unknown", etc.) have been included in chi-squared tests but omitted in this table for space | Quality of consultation                                                     |                                         |                                                                | Accessing medication                               |                |                                                                                          | Managing the process at home                                                      |                 |                                                                             |                                                               |                      |                                                                       | Overall satisfaction & preferences                          |                                                                 |                                                             |                                                                                      |                                                                                       |                   |                       |
|--------------------------------------------------------------------------------------------------------------------------------------------------|-----------------------------------------------------------------------------|-----------------------------------------|----------------------------------------------------------------|----------------------------------------------------|----------------|------------------------------------------------------------------------------------------|-----------------------------------------------------------------------------------|-----------------|-----------------------------------------------------------------------------|---------------------------------------------------------------|----------------------|-----------------------------------------------------------------------|-------------------------------------------------------------|-----------------------------------------------------------------|-------------------------------------------------------------|--------------------------------------------------------------------------------------|---------------------------------------------------------------------------------------|-------------------|-----------------------|
|                                                                                                                                                  | n (%) each subgroup in sample reporting able to talk privately during cons. |                                         | n (%) each subgroup feeling able to ask questions during cons. | n (%) each subgroup receiving medication by method |                | Of postal patients: n (%) each subgroup with concerns about receiving medication by post | n (%) each subgroup reporting having enough info. to take the meds. by themselves |                 | n (%) each subgroup reporting concerns about taking the meds. by themselves | n (%) each subgroup reporting being able to manage their pain |                      | n (%) each subgroup feeling confident they had passed their pregnancy | n (%) each subgroup rating their care "poor" or "very poor" | n (%) each subgroup rating their care neither "poor" nor "good" | n (%) each subgroup rating their care "good" or "very good" | n (%) each subgroup who would NOT have preferred a F2F appointment for this abortion | n (%) each subgroup choosing each abortion care pathway for an abortion in the future |                   |                       |
|                                                                                                                                                  | Yes definitely, without problems                                            | Yes, somewhat, but I had to take action | Yes, able to ask questions                                     | Post                                               | Pick-up        | Yes, have concerns                                                                       | Yes, definitely                                                                   | Yes, somewhat   | Yes, specify                                                                | Yes - effectively                                             | Somewhat effectively | Yes, confident                                                        | Poor/very poor                                              | Neither poor nor good                                           | Good/very good                                              | No, would not have preferred F2F                                                     | Telephone/video link                                                                  | Face to face      | Don't know/it depends |
| Overall sample                                                                                                                                   | 1185 (95.3%)                                                                | 57 (4.6%)                               | 1234 (99.3%)                                                   | 846 (68.1%)                                        | 391 (31.5%)    | 71 (8.4%)                                                                                | 1148 (92.4%)                                                                      | 68 (5.5%)       | 157 (12.6%)                                                                 | 1093 (87.9%)                                                  | 103 (8.3%)           | 1064 (85.6%)                                                          | 7 (0.6%)                                                    | 10 (0.8%)                                                       | 1220 (98.2%)                                                | 1035 (83.3%)                                                                         | 824 (66.3%)                                                                           | 275 (22.1%)       | 144 (11.6%)           |
| <b>Age group</b>                                                                                                                                 |                                                                             |                                         |                                                                |                                                    |                |                                                                                          |                                                                                   |                 |                                                                             |                                                               |                      |                                                                       |                                                             |                                                                 |                                                             |                                                                                      |                                                                                       |                   |                       |
| Under 20s (n=67)                                                                                                                                 | 67 (100%)                                                                   | 0 (0.0%)                                | 67 (100%)                                                      | 47 (70.2%)                                         | 20 (29.9%)     | 4 (8.7%)                                                                                 | <b>67 (100%)</b>                                                                  | <b>0 (0.0%)</b> | 11 (16.4%)                                                                  | 58 (86.6%)                                                    | 6 (9.0%)             | 61 (91.0%)                                                            | 0 (0.0%)                                                    | 0 (0.0%)                                                        | 66 (100%)                                                   | 53 (79.1%)                                                                           | <b>39 (58.2%)</b>                                                                     | <b>24 (35.8%)</b> | <b>4 (6.0%)</b>       |
| Aged 20-24 (n=221)                                                                                                                               | 215 (98.6%)                                                                 | 3 (1.4%)                                | 217 (99.5%)                                                    | 138 (63.3%)                                        | 80 (36.7%)     | 10 (7.4%)                                                                                | 201 (92.2%)                                                                       | 14 (6.4%)       | 29 (13.3%)                                                                  | 181 (83.0%)                                                   | 25 (11.5%)           | 198 (90.8%)                                                           | 0 (0.0%)                                                    | 0 (0.0%)                                                        | 218 (100%)                                                  | 180 (82.6%)                                                                          | 130 (59.6%)                                                                           | 58 (26.6%)        | 30 (13.8%)            |
| Aged 25-29 (n=295)                                                                                                                               | <b>271 (92.8%)</b>                                                          | <b>20 (6.9%)</b>                        | 289 (99.0%)                                                    | 203 (69.5%)                                        | 89 (30.5%)     | 14 (7.0%)                                                                                | 266 (91.1%)                                                                       | 15 (5.1%)       | 29 (9.9%)                                                                   | 258 (88.4%)                                                   | 27 (9.3%)            | 242 (82.9%)                                                           | <b>1 (0.4%)</b>                                             | <b>6 (2.1%)</b>                                                 | <b>282 (97.6%)</b>                                          | 241 (82.5%)                                                                          | 192 (65.8%)                                                                           | 63 (21.6%)        | 37 (12.7%)            |
| Aged 30-34 (n=297)                                                                                                                               | 281 (96.6%)                                                                 | 10 (3.4%)                               | 289 (99.3%)                                                    | 200 (68.7%)                                        | 91 (31.3%)     | 16 (8.7%)                                                                                | 263 (90.4%)                                                                       | 24 (8.3%)       | 39 (13.4%)                                                                  | 258 (88.7%)                                                   | 21 (7.2%)            | 256 (88.0%)                                                           | <b>6 (2.1%)</b>                                             | <b>1 (0.4%)</b>                                                 | <b>282 (97.6%)</b>                                          | 246 (84.5%)                                                                          | 194 (66.7%)                                                                           | 61 (21.0%)        | 36 (12.4%)            |
| Aged 35-39 (n=225)                                                                                                                               | <b>203 (92.3%)</b>                                                          | <b>17 (7.7%)</b>                        | 219 (99.6%)                                                    | 156 (70.9%)                                        | 64 (29.1%)     | 16 (10.6%)                                                                               | <b>213 (96.8%)</b>                                                                | <b>5 (2.3%)</b> | 30 (13.6%)                                                                  | 196 (89.1%)                                                   | 18 (8.2%)            | 186 (84.6%)                                                           | 0 (0.0%)                                                    | 1 (0.5%)                                                        | 219 (99.6%)                                                 | 182 (82.7%)                                                                          | 156 (70.9%)                                                                           | 42 (19.1%)        | 22 (10.0%)            |
| Aged 40+ (n=123)                                                                                                                                 | 117 (95.1%)                                                                 | 6 (4.9%)                                | 122 (99.2%)                                                    | 83 (67.5%)                                         | 40 (32.5%)     | 9 (11.1%)                                                                                | 111 (90.2%)                                                                       | 7 (5.7%)        | 15 (12.2%)                                                                  | 115 (93.5%)                                                   | 5 (4.1%)             | <b>92 (74.8%)</b>                                                     | 0 (0.0%)                                                    | 1 (0.8%)                                                        | 122 (99.2%)                                                 | 107 (87.0%)                                                                          | 91 (74.0%)                                                                            | 18 (14.6%)        | 14 (11.4%)            |
| Unknown age (n=15)                                                                                                                               | Not included in tests as n<20                                               |                                         |                                                                |                                                    |                |                                                                                          |                                                                                   |                 |                                                                             |                                                               |                      |                                                                       |                                                             |                                                                 |                                                             |                                                                                      |                                                                                       |                   |                       |
| Chi2                                                                                                                                             | <b>p=0.023</b>                                                              | p=0.928                                 | p=0.612                                                        | p=0.807                                            | <b>p=0.007</b> | p=0.659                                                                                  | p=0.301                                                                           | <b>p=0.001</b>  | p=0.005                                                                     | p=0.756                                                       | <b>p=0.035</b>       |                                                                       |                                                             |                                                                 |                                                             |                                                                                      |                                                                                       |                   |                       |
| <b>Ethnicity</b>                                                                                                                                 |                                                                             |                                         |                                                                |                                                    |                |                                                                                          |                                                                                   |                 |                                                                             |                                                               |                      |                                                                       |                                                             |                                                                 |                                                             |                                                                                      |                                                                                       |                   |                       |
| White British/ White other (n=660)                                                                                                               | 620 (95.4%)                                                                 | 30 (4.6%)                               | 646 (99.4%)                                                    | 467 (71.9%)                                        | 183 (28.2%)    | 35 (7.7%)                                                                                | 599 (92.2%)                                                                       | 35 (5.4%)       | <b>57 (8.8%)</b>                                                            | 583 (89.7%)                                                   | 48 (7.4%)            | 564 (86.8%)                                                           | 4 (0.6%)                                                    | 1 (0.2%)                                                        | 643 (99.2%)                                                 | 557 (85.7%)                                                                          | 452 (69.5%)                                                                           | 119 (18.3%)       | 79 (12.2%)            |
| Mixed/ Multiple ethnicities (n=69)                                                                                                               | 64 (92.8%)                                                                  | 5 (7.3%)                                | 69 (100%)                                                      | 42 (60.9%)                                         | 27 (39.1%)     | 6 (14.6%)                                                                                | 63 (91.3%)                                                                        | 3 (4.4%)        | 12 (17.4%)                                                                  | 57 (82.6%)                                                    | 8 (11.6%)            | 59 (85.5%)                                                            | 1 (1.5%)                                                    | 1 (1.5%)                                                        | 67 (97.1%)                                                  | 57 (82.6%)                                                                           | 43 (62.3%)                                                                            | 19 (27.5%)        | 7 (10.1%)             |

|                                                              |                               |           |             |                        |                        |               |                |           |                |                |               |             |          |          |                |                        |                |                |               |
|--------------------------------------------------------------|-------------------------------|-----------|-------------|------------------------|------------------------|---------------|----------------|-----------|----------------|----------------|---------------|-------------|----------|----------|----------------|------------------------|----------------|----------------|---------------|
| Black/<br>African/<br>Caribbean/<br>Black British<br>(n=161) | 153<br>(96.8%)                | 5 (3.2%)  | 157 (99.4%) | 104<br>(65.8%)         | 54<br>(34.2%)          | 9 (8.9%)      | 141<br>(89.2%) | 14 (8.9%) | 24 (15.2%)     | 131<br>(82.9%) | 20<br>(12.7%) | 132 (83.5%) | 0 (0.0%) | 3 (1.9%) | 153<br>(98.1%) | <b>119<br/>(75.3%)</b> | 88<br>(55.7%)  | 48 (30.4%)     | 22<br>(13.9%) |
| Asian/<br>British<br>(n=189)                                 | 179<br>(95.2%)                | 9 (4.8%)  | 186 (98.9%) | 117<br>(62.2%)         | 71<br>(37.8%)          | 8 (7.1%)      | 179<br>(95.2%) | 8 (4.3%)  | 30 (16.0%)     | 165<br>(87.8%) | 17 (9.0%)     | 163 (86.7%) | 1 (0.5%) | 3 (1.6%) | 183<br>(97.9%) | 161<br>(85.6%)         | 127<br>(67.6%) | 44 (23.4%)     | 17<br>(9.0%)  |
| Other ethnic<br>group (not<br>specified)<br>(n=26)           | 22<br>(88.0%)                 | 3 (12.0%) | 25 (100%)   | 17<br>(68.0%)          | 8<br>(32.0%)           | 4 (26.7%)     | 23<br>(92.0%)  | 2 (8.0%)  | 5 (20.0%)      | 25<br>(100%)   | 0 (0.0%)      | 19 (76.0%)  | 0 (0.0%) | 0 (0.0%) | 25<br>(100%)   | 21 (84.0%)             | 16<br>(64.0%)  | 5 (20.0%)      | 4<br>(16.0%)  |
| Unknown<br>ethnicity<br>(n=138)                              | 116<br>(95.9%)                | 4 (3.3%)  | 120 (99.2%) | 80<br>(66.1%)          | 41<br>(33.9%)          | 7 (9.1%)      | 116<br>(95.9%) | 3 (2.5%)  | 25 (20.7%)     | 105<br>(86.8%) | 9 (7.4%)      | 98 (81.0%)  | 1 (0.8%) | 1 (0.8%) | 118<br>(98.3%) | <b>94 (77.7%)</b>      | 76<br>(62.8%)  | 31 (25.6%)     | 14<br>(11.6%) |
| Chi2                                                         | p=0.156                       |           | p=0.948     | p=0.093                |                        | p=0.115       | p=0.293        |           | <b>p=0.001</b> | p=0.203        |               | p=0.375     | p=0.390  |          |                | <b>p=0.020</b>         | p=0.063        |                |               |
| <b>Marital status</b>                                        |                               |           |             |                        |                        |               |                |           |                |                |               |             |          |          |                |                        |                |                |               |
| Single<br>(n=389)                                            | 360<br>(94.7%)                | 20 (5.3%) | 378 (99.5%) | 268<br>(70.5%)         | 112<br>(29.5%)         | 25 (9.6%)     | 355<br>(93.4%) | 20 (5.3%) | 45 (11.8%)     | 325<br>(85.5%) | 41<br>(10.8%) | 326 (85.8%) | 1 (0.3%) | 3 (0.8%) | 372<br>(98.9%) | 312<br>(82.1%)         | 233<br>(61.3%) | 93 (24.5%)     | 54<br>(14.2%) |
| Partnered<br>(n=418)                                         | 398<br>(96.1%)                | 15 (3.6%) | 412 (99.5%) | 273<br>(65.9%)         | 141<br>(34.1%)         | 22 (8.5%)     | 380<br>(91.8%) | 21 (5.1%) | 59 (14.3%)     | 357<br>(86.2%) | 38 (9.2%)     | 358 (86.5%) | 1 (0.2%) | 4 (1.0%) | 408<br>(98.8%) | 342<br>(82.6%)         | 271<br>(65.5%) | 98 (23.7%)     | 45<br>(10.9%) |
| Married/Civil<br>partnership<br>(n=247)                      | 225<br>(92.6%)                | 18 (7.4%) | 241 (99.2%) | 164<br>(67.5%)         | 79<br>(32.5%)          | 17<br>(10.7%) | 221<br>(91.0%) | 15 (6.2%) | 30 (12.4%)     | 228<br>(93.8%) | 9 (3.7%)      | 198 (81.5%) | 3 (1.2%) | 0 (0.0%) | 239<br>(98.8%) | 207<br>(85.2%)         | 175<br>(72.0%) | 39 (16.1%)     | 29<br>(11.9%) |
| Separated/<br>Widowed/<br>Divorced<br>(n=40)                 | 40<br>(100%)                  | 0 (0.0%)  | 40 (100%)   | 28<br>(70.0%)          | 12<br>(30.0%)          | 2 (7.1%)      | 39<br>(97.5%)  | 1 (2.5%)  | 4 (10.0%)      | 37<br>(92.5%)  | 3 (7.5%)      | 32 (80.0%)  | 0 (0.0%) | 0 (0.0%) | 40<br>(100%)   | 36 (90.0%)             | 28<br>(70.0%)  | 9 (22.5%)      | 3<br>(7.5%)   |
| Unknown<br>marital<br>status<br>(n=149)                      | 131<br>(97.8%)                | 3 (2.2%)  | 132 (98.5%) | 94<br>(70.2%)          | 40<br>(29.9%)          | 3 (3.3%)      | 126<br>(94.0%) | 8 (6.0%)  | 15 (11.2%)     | 119<br>(88.8%) | 11 (8.2%)     | 121 (90.3%) | 2 (1.5%) | 2 (1.5%) | 130<br>(97.0%) | 112<br>(83.6%)         | 95<br>(70.9%)  | 27 (20.2%)     | 12<br>(9.0%)  |
| Chi2                                                         | p=0.194                       |           | p=0.721     | p=0.686                |                        | p=0.350       | p=0.337        |           | p=0.787        | p=0.073        |               | p=0.138     | p=0.355  |          |                | p=0.653                | p=0.126        |                |               |
| <b>Region</b>                                                |                               |           |             |                        |                        |               |                |           |                |                |               |             |          |          |                |                        |                |                |               |
| East<br>Midlands<br>(n=4)                                    | Not included in tests as n<20 |           |             |                        |                        |               |                |           |                |                |               |             |          |          |                |                        |                |                |               |
| East of<br>England<br>(n=196)                                | 185<br>(94.4%)                | 11 (5.6%) | 195 (99.5%) | <b>164<br/>(83.7%)</b> | <b>32<br/>(16.3%)</b>  | 14 (8.7%)     | 177<br>(90.3%) | 12 (6.1%) | 19 (9.7%)      | 178<br>(90.8%) | 12 (6.1%)     | 164 (83.7%) | 3 (1.5%) | 0 (0.0%) | 192<br>(98.5%) | 171<br>(87.2%)         | 122<br>(62.2%) | 42 (21.4%)     | 32<br>(16.3%) |
| Greater<br>London<br>(n=632)                                 | 596<br>(95.1%)                | 30 (4.8%) | 623 (99.4%) | <b>398<br/>(63.5%)</b> | <b>229<br/>(36.5%)</b> | 36 (9.5%)     | 571<br>(91.1%) | 41 (6.5%) | 94 (15.0%)     | 544<br>(86.8%) | 58 (9.3%)     | 540 (86.1%) | 3 (0.5%) | 8 (1.3%) | 611<br>(98.2%) | 506<br>(80.7%)         | 406<br>(64.8%) | 154<br>(24.6%) | 67<br>(10.7%) |
| North East<br>(n=38)                                         | 37<br>(97.4%)                 | 1 (2.6%)  | 37 (97.4%)  | 29<br>(76.3%)          | 9<br>(23.7%)           | 3 (10.7%)     | 37<br>(97.4%)  | 0 (0.0%)  | 4 (10.5%)      | 31<br>(81.6%)  | 5 (13.2%)     | 32 (84.2%)  | 0 (0.0%) | 0 (0.0%) | 38<br>(100%)   | 32 (84.2%)             | 26<br>(68.4%)  | 8 (21.1%)      | 4<br>(10.5%)  |
| North West<br>(n=207)                                        | 203<br>(98.5%)                | 3 (1.5%)  | 204 (99.0%) | <b>125<br/>(60.7%)</b> | <b>81<br/>(39.3%)</b>  | 6 (5.0%)      | 199<br>(96.6%) | 5 (2.4%)  | 18 (8.7%)      | 183<br>(88.8%) | 16 (7.8%)     | 174 (84.5%) | 0 (0.0%) | 1 (0.5%) | 205<br>(99.5%) | 179<br>(86.9%)         | 144<br>(69.9%) | 40 (19.4%)     | 22<br>(10.7%) |
| South East<br>(n=67)                                         | 63<br>(94.0%)                 | 4 (6.0%)  | 67 (100%)   | <b>57<br/>(85.1%)</b>  | <b>10<br/>(14.9%)</b>  | 5 (9.3%)      | 62<br>(92.5%)  | 5 (7.5%)  | 9 (13.4%)      | 63<br>(94.0%)  | 3 (4.5%)      | 60 (89.6%)  | 0 (0.0%) | 0 (0.0%) | 67<br>(100%)   | 55 (82.1%)             | 49<br>(73.1%)  | 9 (13.4%)      | 9<br>(13.4%)  |
| South West<br>(n=77)                                         | 70<br>(90.9%)                 | 7 (9.1%)  | 77 (100%)   | 54<br>(70.1%)          | 23<br>(29.9%)          | 5 (9.4%)      | 75<br>(97.4%)  | 2 (2.6%)  | 9 (11.7%)      | 67<br>(87.0%)  | 8 (10.4%)     | 65 (84.4%)  | 1 (1.3%) | 0 (0.0%) | 76<br>(98.7%)  | 66 (85.7%)             | 55<br>(71.4%)  | 13 (16.9%)     | 9<br>(11.7%)  |
| West<br>Midlands<br>(n=7)                                    | Not included in tests as n<20 |           |             |                        |                        |               |                |           |                |                |               |             |          |          |                |                        |                |                |               |

| Region unknown (n=15)                           | Not included in tests as n<20 |                  |                   |                    |                    |                |                   |            |                   |                    |                   |             |          |             |              |             |             |             |             |
|-------------------------------------------------|-------------------------------|------------------|-------------------|--------------------|--------------------|----------------|-------------------|------------|-------------------|--------------------|-------------------|-------------|----------|-------------|--------------|-------------|-------------|-------------|-------------|
| Chi2                                            | p=0.424                       | p=0.611          | <b>p&lt;0.001</b> | p=0.759            | p=0.088            | p=0.169        | p=0.725           | p=0.862    | p=0.346           | p=0.182            | p=0.278           |             |          |             |              |             |             |             |             |
| <b>Postal vs pick up</b>                        |                               |                  |                   |                    |                    |                |                   |            |                   |                    |                   |             |          |             |              |             |             |             |             |
| Postal only (n=846)                             | 780 (94.3%)                   | 46 (5.6%)        | 820 (99.2%)       |                    |                    | 757 (91.5%)    | 51 (6.2%)         | 98 (11.9%) | 734 (88.8%)       | 68 (8.2%)          | 703 (85.0%)       | 4 (0.5%)    | 4 (0.5%) | 815 (99.0%) | 698 (84.4%)  | 560 (67.7%) | 167 (20.2%) | 100 (12.1%) |             |
| Pick up only (n=391)                            | 374 (97.4%)                   | 10 (2.6%)        | 383 (99.7%)       |                    |                    | 364 (94.8%)    | 14 (3.7%)         | 55 (14.3%) | 332 (86.5%)       | 34 (8.9%)          | 332 (86.5%)       | 3 (0.8%)    | 5 (1.3%) | 374 (97.9%) | 311 (81.0%)  | 242 (63.0%) | 99 (25.8%)  | 43 (11.2%)  |             |
| Unknown or combination (n=6)                    | Not included in tests as n<20 |                  |                   |                    |                    |                |                   |            |                   |                    |                   |             |          |             |              |             |             |             |             |
| Chi2                                            | p=0.058                       | p=0.241          |                   |                    | p=0.129            | p=0.228        | p=0.312           | p=0.505    | p=0.246           | p=0.138            | p=0.092           |             |          |             |              |             |             |             |             |
| <b>Previous abortion</b>                        |                               |                  |                   |                    |                    |                |                   |            |                   |                    |                   |             |          |             |              |             |             |             |             |
| No previous abortion (n=651)                    | 615 (95.9%)                   | 25 (3.9%)        | 636 (99.2%)       | 436 (68.0%)        | 205 (32.0%)        | 36 (8.6%)      | 591 (92.2%)       | 35 (5.5%)  | 92 (14.4%)        | <b>552 (86.1%)</b> | <b>68 (10.6%)</b> | 549 (85.7%) | 3 (0.5%) | 3 (0.5%)    | 630 (99.1%)  | 531 (82.8%) | 416 (64.9%) | 155 (24.2%) | 70 (10.9%)  |
| At least one previous abortion (n=592)          | 539 (94.6%)                   | 31 (5.4%)        | 567 (99.5%)       | 391 (68.6%)        | 179 (31.4%)        | 33 (8.7%)      | 530 (93.0%)       | 30 (5.3%)  | 61 (10.7%)        | <b>514 (90.2%)</b> | <b>34 (6.0%)</b>  | 486 (85.3%) | 4 (0.7%) | 6 (1.1%)    | 559 (98.2%)  | 478 (83.9%) | 386 (67.7%) | 111 (19.5%) | 73 (12.8%)  |
| Chi2                                            | p=0.287                       | p=0.586          | p=0.829           | p=0.989            | p=0.762            | p=0.056        | <b>p=0.014</b>    | p=0.850    | p=0.436           | p=0.635            | p=0.116           |             |          |             |              |             |             |             |             |
| <b>Previous live birth</b>                      |                               |                  |                   |                    |                    |                |                   |            |                   |                    |                   |             |          |             |              |             |             |             |             |
| No previous live birth (n=436)                  | <b>427 (98.6%)</b>            | <b>5 (1.2%)</b>  | 432 (99.8%)       | <b>261 (60.3%)</b> | <b>172 (39.7%)</b> | 23 (9.0%)      | 404 (93.3%)       | 20 (4.6%)  | <b>67 (15.5%)</b> | <b>350 (80.8%)</b> | <b>62 (14.3%)</b> | 375 (86.6%) | 1 (0.2%) | 4 (0.9%)    | 422 (98.8%)  | 354 (81.8%) | 275 (63.5%) | 107 (24.7%) | 51 (11.8%)  |
| At least one previous live birth (n=807)        | <b>727 (93.4%)</b>            | <b>51 (6.6%)</b> | 771 (99.1%)       | <b>566 (72.8%)</b> | <b>212 (27.3%)</b> | 46 (8.5%)      | 717 (92.2%)       | 45 (5.8%)  | <b>86 (11.1%)</b> | <b>716 (92.0%)</b> | <b>40 (5.1%)</b>  | 660 (84.8%) | 6 (0.8%) | 5 (0.6%)    | 767 (98.6%)  | 655 (84.2%) | 527 (67.7%) | 159 (20.4%) | 92 (11.8%)  |
| Chi2                                            | <b>p&lt;0.001</b>             | p=0.169          | <b>p&lt;0.001</b> | p=0.797            | p=0.690            | <b>p=0.027</b> | <b>p&lt;0.001</b> | p=0.402    | p=0.430           | p=0.276            | p=0.216           |             |          |             |              |             |             |             |             |
| <b>Previous miscarriage</b>                     |                               |                  |                   |                    |                    |                |                   |            |                   |                    |                   |             |          |             |              |             |             |             |             |
| No previous miscarriage (n=949)                 | <b>900 (96.2%)</b>            | <b>35 (3.7%)</b> | 930 (99.4%)       | 639 (68.3%)        | 297 (31.7%)        | 52 (8.4%)      | 863 (92.2%)       | 54 (5.8%)  | 123 (13.1%)       | 816 (87.2%)        | 84 (9.0%)         | 806 (86.1%) | 5 (0.5%) | 8 (0.9%)    | 917 (98.6%)  | 773 (82.6%) | 614 (65.6%) | 217 (23.2%) | 105 (11.2%) |
| At least one previous miscarriage (n=294)       | <b>254 (92.4%)</b>            | <b>21 (7.6%)</b> | 273 (99.3%)       | 188 (68.4%)        | 87 (31.6%)         | 17 (9.4%)      | 258 (93.8%)       | 11 (4.0%)  | 30 (10.9%)        | 250 (90.9%)        | 18 (6.6%)         | 229 (83.3%) | 2 (0.7%) | 1 (0.4%)    | 272 (98.9%)  | 236 (85.8%) | 188 (68.4%) | 49 (17.8%)  | 38 (13.8%)  |
| Chi2                                            | <b>p=0.022</b>                | p=0.877          | p=0.976           | p=0.685            | p=0.516            | p=0.327        | p=0.242           | p=0.240    | p=0.659           | p=0.206            | p=0.120           |             |          |             |              |             |             |             |             |
| <b>Previous caesarean section</b>               |                               |                  |                   |                    |                    |                |                   |            |                   |                    |                   |             |          |             |              |             |             |             |             |
| No previous caesarean (n=1,041)                 | 983 (95.6%)                   | 44 (4.3%)        | 1,022 (99.4%)     | 698 (67.9%)        | 330 (32.1%)        | 63 (9.3%)      | 950 (92.4%)       | 54 (5.3%)  | 130 (12.7%)       | 900 (87.6%)        | 92 (9.0%)         | 876 (85.2%) | 6 (0.6%) | 8 (0.8%)    | 1008 (98.6%) | 858 (83.5%) | 676 (65.8%) | 227 (22.1%) | 125 (12.2%) |
| At least one previous caesarean section (n=202) | 171 (93.4%)                   | 12 (6.6%)        | 181 (98.9%)       | 129 (70.5%)        | 54 (29.5%)         | 6 (4.9%)       | 171 (93.4%)       | 11 (6.0%)  | 23 (12.6%)        | 166 (90.7%)        | 10 (5.5%)         | 159 (86.9%) | 1 (0.6%) | 1 (0.6%)    | 181 (98.9%)  | 151 (82.5%) | 126 (68.9%) | 39 (21.3%)  | 18 (9.8%)   |
| Chi2                                            | p=0.368                       | p=0.433          | p=0.487           | p=0.106            | p=0.274            | p=0.977        | p=0.292           | p=0.555    | p=0.941           | p=0.751            | p=0.614           |             |          |             |              |             |             |             |             |

## Supplementary Figure 1 – Survey Instrument

| MSI Reproductive Choices UK – telemedicine client feedback question set                                                                                                |                                                                                                                                                                                    |
|------------------------------------------------------------------------------------------------------------------------------------------------------------------------|------------------------------------------------------------------------------------------------------------------------------------------------------------------------------------|
| <b>1. During the phone/video consultation with the nurse or doctor, did you have the opportunity to ask any questions or about concerns you had?</b>                   | <ul style="list-style-type: none"> <li>No – specify</li> <li>Yes</li> </ul>                                                                                                        |
| <b>If NO to Q1 - please tell us more about why not [free text]</b>                                                                                                     |                                                                                                                                                                                    |
| <b>2. Could you talk privately during the consultation?</b>                                                                                                            | <ul style="list-style-type: none"> <li>Not sure – I had to be careful</li> <li>Yes somewhat – but I had to take action</li> <li>Yes definitely – I could talk privately</li> </ul> |
| <b>3. Did you feel confident about how far along you were in your pregnancy based on your dates?</b>                                                                   | <ul style="list-style-type: none"> <li>No – specify</li> <li>Yes, somewhat confident</li> <li>Yes, very confident</li> </ul>                                                       |
| <b>If NO to Q3 - please tell us more about why not [free text]</b>                                                                                                     |                                                                                                                                                                                    |
| <b>4. Did you choose to receive your medications by mail or did you pick them up from a clinic?</b>                                                                    | <ul style="list-style-type: none"> <li>Pick up from clinic</li> <li>By mail</li> </ul>                                                                                             |
| <b>5. Why did you chose to receive your medications by mail/from the clinic? [free text]</b>                                                                           |                                                                                                                                                                                    |
| <b>6. Did the medications arrive promptly and in good condition?</b>                                                                                                   | <ul style="list-style-type: none"> <li>No – specify</li> <li>Yes</li> <li>N/A – picked up</li> </ul>                                                                               |
| <b>If NO to Q6 - please share any problems or concerns you had [free text]</b>                                                                                         |                                                                                                                                                                                    |
| <b>7. Did you have any concerns about receiving medications in the mail?</b>                                                                                           | <ul style="list-style-type: none"> <li>No</li> <li>Yes – specify</li> <li>N/A – picked up</li> </ul>                                                                               |
| <b>If YES to Q7 - please share any problems or concerns you had [free text]</b>                                                                                        |                                                                                                                                                                                    |
| <b>8. Did you feel that you had enough information about how to take the medications by yourself at home?</b>                                                          | <ul style="list-style-type: none"> <li>No – specify</li> <li>Yes, somewhat</li> <li>Yes, definitely</li> </ul>                                                                     |
| <b>If NO to Q8 - please share with us what information you needed [free text]</b>                                                                                      |                                                                                                                                                                                    |
| <b>9. Did you have any concerns about the safety of using the medications by yourself at home?</b>                                                                     | <ul style="list-style-type: none"> <li>No</li> <li>Yes - specify</li> </ul>                                                                                                        |
| <b>If YES to Q9 - what concerns did you have? [free text]</b>                                                                                                          |                                                                                                                                                                                    |
| <b>10. Did you have any other problems or concerns about using the medications by yourself at home? [free text]</b>                                                    |                                                                                                                                                                                    |
| <b>11. Have you been able to manage your pain effectively?</b>                                                                                                         | <ul style="list-style-type: none"> <li>No</li> <li>Yes, somewhat effectively</li> <li>Yes, effectively</li> <li>Not sure</li> </ul>                                                |
| <b>12. On a scale of 0-10, if 0 is no pain and 10 is the worst pain imaginable, how would you rate the worst abortion pain you had since you took the medications?</b> | <ul style="list-style-type: none"> <li>0-10 scale</li> </ul>                                                                                                                       |

|                                                                                                                                                                                                                                                                                                                                                    |
|----------------------------------------------------------------------------------------------------------------------------------------------------------------------------------------------------------------------------------------------------------------------------------------------------------------------------------------------------|
| <b>13. On a scale of 0-10, if 0 is no pain and 10 is the worst pain imaginable, how would you rate the worst pain you might experience during a normal period?</b> <ul style="list-style-type: none"><li>• 0-10 scale</li></ul>                                                                                                                    |
| <b>14. After you used the misoprostol, how many days of bleeding did you have that were heavier than the heaviest day of your period? [If &lt;1 day, arrange nurse call back] [free text]</b>                                                                                                                                                      |
| <b>15. Did you feel confident that you had passed the pregnancy?</b> <ul style="list-style-type: none"><li>• No</li><li>• Yes</li><li>• Not sure</li></ul>                                                                                                                                                                                         |
| <b>16. Ideally, would you have preferred to see a doctor/nurse in person and receive your medications at the clinic (instead of consulting with the doctor/nurse by phone/video and using your medications in a clinic)?</b> <ul style="list-style-type: none"><li>• No</li><li>• Yes – specify</li><li>• Not sure</li></ul>                       |
| <b>If YES to Q16 - please share your thoughts with us [free text]</b>                                                                                                                                                                                                                                                                              |
| <b>17. If you had another abortion in the future, after COVID19 outbreak measures are relaxed, would you prefer to have your care over the telephone, by video link or face-to-face in clinic?</b> <ul style="list-style-type: none"><li>• By telephone</li><li>• Face to face</li><li>• Via video link</li><li>• Don't know/ it depends</li></ul> |
| <b>18. Could you tell us a bit about why you would choose that option? [free text]</b>                                                                                                                                                                                                                                                             |
| <b>19. Have you had to seek help or advice about problems arising from the abortion?</b> <ul style="list-style-type: none"><li>• No</li><li>• Yes – MSI phone call</li><li>• Yes – MSI in person</li><li>• Yes – GP</li><li>• Yes - hospital</li></ul>                                                                                             |
| <b>20. Overall, how was your experience of our service?</b> <ul style="list-style-type: none"><li>• Very poor</li><li>• Poor</li><li>• Neither good nor poor</li><li>• Good</li><li>• Very good</li><li>• Don't know</li></ul>                                                                                                                     |
| <b>21. Please confirm that you have received the link to the aftercare booklet including the number for the 24/7 aftercare helpline?</b> <ul style="list-style-type: none"><li>• Yes</li><li>• No (if no, please resend)</li></ul>                                                                                                                 |
| <b>22. Do you have any concerns that you would like to speak to a nurse about?</b> <ul style="list-style-type: none"><li>• No</li><li>• Yes (if yes, arrange a nurse call back)</li></ul>                                                                                                                                                          |
| <b>23. Do you have any comments about how we could improve the process? [free text]</b>                                                                                                                                                                                                                                                            |
